# Supplementary material
Source: publisher figshare collection journal article supplement (https://sage.figshare.com/ndownloader/files/15604085)
Supplement: Supplementary file 1 [file 15604085]

## SUPPLEMENTAL MATERIALS

| Supplemental Table 1: Types of procedures included in the minor and major surgical procedure groups |                                                                                                  |
|-----------------------------------------------------------------------------------------------------|--------------------------------------------------------------------------------------------------|
| Minor Surgical Procedure                                                                            | Major Surgical Procedure                                                                         |
| Cystoscopy with/without suprapubic catheter placement                                               | Excisional biopsy                                                                                |
| Upper and lower endoscopy                                                                           | Bariatric surgery                                                                                |
| Radiofrequency ablations                                                                            | Aortic valve replacement                                                                         |
| Bronchoscopy                                                                                        | Hernia repair                                                                                    |
| Endoscopic retrograde cholangiopancreatography                                                      | Spinal surgeries (including laminectomy, laminotomy, spinal fusion, discectomy)                  |
| Central venous access device placement                                                              | Gynecologic surgeries (including uterine myomectomy, hysterectomy with and without oophorectomy) |
| Lithotripsy                                                                                         | Urogenital surgery                                                                               |
| Peripheral nerve blocks                                                                             | Orthopedic surgeries (including arthroscopy, open reduction and internal fixation of fractures)  |
| Conventional angiogram                                                                              | Exploratory surgeries (including neck, abdomen)                                                  |
|                                                                                                     | Multiple dental extractions                                                                      |
|                                                                                                     | Ophthalmic surgeries (vitrectomy, strabismus, oculoplastic procedures)                           |
|                                                                                                     | Breast augmentation surgery                                                                      |
|                                                                                                     | Ear, nose and throat surgeries (including septoplasty, turbinate resection)                      |
|                                                                                                     | Extensive wound debridements                                                                     |
|                                                                                                     | Amputations                                                                                      |
|                                                                                                     | Implantation and removal of nerve stimulators                                                    |
|                                                                                                     | Splenectomy                                                                                      |
|                                                                                                     | Cholecystectomy                                                                                  |
|                                                                                                     | Prostatectomy                                                                                    |
|                                                                                                     | Nephrectomy                                                                                      |

| Supplemental Table 2: Characteristics of Invasive Surgical Procedures and Relapse Events in a Cohort of 281 Multiple Sclerosis Patients |                          |                          |
|-----------------------------------------------------------------------------------------------------------------------------------------|--------------------------|--------------------------|
|                                                                                                                                         | Minor Surgical Procedure | Major Surgical Procedure |
| Number of patients                                                                                                                      | 178                      | 179                      |
| Total Number of Procedures (mean; min, max) <sup>a</sup>                                                                                | 299 (1.7; 1,11)          | 311 (1.7; 1,8)           |
| Total Days in Study                                                                                                                     | 196,007                  | 195,876                  |
| Average Days in Study                                                                                                                   | 1,101                    | 1,094                    |
| Number of Days Exposed <sup>b</sup>                                                                                                     | 26,639                   | 27,473                   |
| Number of Days Unexposed                                                                                                                | 169,368                  | 168,403                  |
| Total Number of Relapses (min, max)                                                                                                     | 37 (0,5)                 | 55 (0,3)                 |
| Number of Relapses Pre-procedure                                                                                                        | 33                       | 47                       |
| Number of Relapses Post-procedure                                                                                                       | 4                        | 8                        |

<sup>a</sup> Mean for the entire sample = 2.2 procedures

<sup>b</sup> 90-day period after each procedure
